# Supplementary material
Source: PubMed Central journal article supplement (PMC4249290)
Supplement: IAI.02035-14_zii999090988so1.pdf [file IAI.02035-14_zii999090988so1.pdf]

**Table S1. Bacterial strains and plasmids**

| Strain or plasmid                                          | Description                                                                                                                                                                                                                     | Reference  |
|------------------------------------------------------------|---------------------------------------------------------------------------------------------------------------------------------------------------------------------------------------------------------------------------------|------------|
| <b><i>S. pyogenes</i></b>                                  |                                                                                                                                                                                                                                 |            |
| MGAS2221                                                   | Wild-type, M1-serotype strain                                                                                                                                                                                                   | (1)        |
| SF370                                                      | Wild-type, M1-serotype strain                                                                                                                                                                                                   | (2)        |
| JRS4-PolHis                                                | The JRS4 strain has the plasmid integrated into the chromosome by a single cross-over event at the <i>rpoC</i> gene which encodes the $\beta$ subunit of RNA polymerase, creating a His <sub>6</sub> tag at its C-terminal end. | (3)        |
| MGAS8232                                                   | Wild-type, M18-serotype strain                                                                                                                                                                                                  | (4)        |
| 87-282                                                     | Wild-type, M18-serotype strain                                                                                                                                                                                                  | (5)        |
| Manfredo                                                   | Wild-type, M5-serotype strain                                                                                                                                                                                                   | (6)        |
| Vaughn                                                     | Wild-type, M5-serotype strain                                                                                                                                                                                                   | (5)        |
| Alab49                                                     | Wild-type, M53-serotype strain                                                                                                                                                                                                  | (7)        |
| NZ131                                                      | Wild-type, M49-serotype strain                                                                                                                                                                                                  | (8)        |
| Bisno9                                                     | M53-serotype clinical isolate                                                                                                                                                                                                   | This study |
| Bisno21                                                    | M3-serotype clinical isolate                                                                                                                                                                                                    | This study |
| 2221 $\Delta$ <i>covR</i>                                  | <i>covR</i> deletion mutant of the MGAS2221 strain                                                                                                                                                                              | (9)        |
| 2221 $\Delta$ P2 $\Delta$ <i>hasS</i>                      | The P2 promoter and the entire <i>hasS</i> sequence are deleted in MGAS2221                                                                                                                                                     | This study |
| 2221 $\Delta$ P2                                           | The P2 promoter is deleted in MGAS2221                                                                                                                                                                                          | This study |
| 2221P1 <sup>-</sup>                                        | The -10 box of the P1 promoter is inactivated by mutations in MGAS2221                                                                                                                                                          | This study |
| 2221 $\Delta$ P2P1 <sup>-</sup>                            | In MGAS2221 P2 promoter is deleted and the -10 box of the P1 promoter is inactivated by mutations                                                                                                                               | This study |
| 2221 $\Delta$ 42T                                          | MGAS2221 has a 42-nt deletion which includes the <i>hasS</i> terminator sequence and the T-rich region located immediately downstream                                                                                           | This study |
| 2221 $\Delta$ 63T                                          | MGAS2221 has a 63-nt deletion which includes the <i>hasS</i> terminator sequence, the T-rich region and 25 nts located immediately downstream                                                                                   | This study |
| 2221 $\Delta$ <i>covR</i> $\Delta$ P2 $\Delta$ <i>hasS</i> | The P2 promoter and the entire <i>hasS</i> sequence are deleted in 2221 $\Delta$ <i>covR</i>                                                                                                                                    | This study |
| 2221 $\Delta$ <i>covR</i> $\Delta$ 42T                     | 2221 $\Delta$ <i>covR</i> has a 42-nt deletion which includes the <i>hasS</i> terminator sequence and the T-rich region located immediately downstream                                                                          | This study |
| 2221 $\Delta$ <i>covR</i> P1 <sup>-</sup>                  | In 2221 $\Delta$ <i>covR</i> the -10 box of the P1 promoter is inactivated by mutations                                                                                                                                         | This study |
| 2221 $\Delta$ <i>covR</i> $\Delta$ 42TP1 <sup>-</sup>      | 2221 $\Delta$ <i>covR</i> has mutations in the -10 box of the P1 promoter and a 42-nt deletion which includes the <i>hasS</i> terminator sequence and the T-rich region located immediately downstream                          | This study |
| 2221 $\Delta$ <i>covR</i> $\Delta$ P2P1 <sup>-</sup>       | In 2221 $\Delta$ <i>covR</i> the P2 promoter is deleted and the -10 box of the P1 promoter is inactivated by mutations                                                                                                          | This study |
| 2221/pKSM <i>hasS</i>                                      | The MGAS2221 strain carrying the pBBL740 <i>hasS</i> plasmid                                                                                                                                                                    | This study |
| SF370 $\Delta$ 63T <sup>a</sup>                            | The SF370 strain has a 63-nt deletion which includes the <i>hasS</i> terminator sequence and the T-rich region located immediately downstream                                                                                   | This study |
| <b><i>E. coli</i></b>                                      |                                                                                                                                                                                                                                 |            |
| DH5 $\alpha$                                               | Cloning host                                                                                                                                                                                                                    | Invitrogen |
| Rosetta (DE3)                                              | Protein expression host                                                                                                                                                                                                         | Novagen    |

| <b>Plasmids</b>                          |                                                                                                                                                                                                                         |            |
|------------------------------------------|-------------------------------------------------------------------------------------------------------------------------------------------------------------------------------------------------------------------------|------------|
| pKSM720                                  | <i>E. coli</i> - <i>Streptococcus</i> vector containing a promoterless luciferase ( <i>luc</i> ) gene with its ribosomal-binding site                                                                                   | (10)       |
| pBBL740                                  | <i>S. pyogenes</i> integrational plasmid                                                                                                                                                                                | (11)       |
| pKSM720P2                                | pKSM720 containing transcriptional fusion of P2 with <i>luc</i>                                                                                                                                                         | This study |
| pKSM720P2T                               | pKSM720 containing transcriptional fusion of <i>luc</i> with a 0.184 kb DNA fragment harboring P2, <i>hasS</i> and the terminator                                                                                       | This study |
| pKSM <i>hasS</i>                         | pKSM720 containing a 305 bp DNA fragment carrying the P2 promoter and <i>hasS</i>                                                                                                                                       | This study |
| pBBL740 <i>hasS</i>                      | pBBL740 containing a 1.4 kbp DNA fragment carrying <i>hasS</i> locus and its flanking either side regions                                                                                                               | This study |
| pBBL740 $\Delta$ P2                      | pBBL740 <i>hasS</i> derived plasmid containing a deletion of the P2 promoter                                                                                                                                            | This study |
| pBBL740P1                                | pBBL740 <i>hasS</i> derived plasmid containing mutations in the -10 box of the P1 promoter                                                                                                                              | This study |
| pBBL740 $\Delta$ P2P1                    | pBBL740 <i>hasS</i> derived plasmid containing a deletion of the P2 promoter and mutations in the -10 box of the P1 promoter                                                                                            | This study |
| pBBL740 $\Delta$ P2 $\Delta$ <i>hasS</i> | pBBL740 <i>hasS</i> derived plasmid containing a deletion of the P2 promoter and the entire <i>hasS</i> sequence including the terminator                                                                               | This study |
| pBBL740 $\Delta$ 42TP1                   | pBBL740 <i>hasS</i> derived plasmid containing mutations in the -10 box of the P1 promoter and a 42-nt deletion which includes the <i>hasS</i> terminator sequence and the T-rich region located immediately downstream | This study |
| pBBL740 $\Delta$ 42T                     | pBBL740 <i>hasS</i> derived plasmid containing a 42-nt deletion which includes the <i>hasS</i> terminator sequence and the T-rich region located immediately downstream                                                 | This study |
| pBBL740 $\Delta$ 63T                     | pBBL740 <i>hasS</i> derived plasmid containing a 63-nt deletion which includes the <i>hasS</i> terminator sequence, the T-rich region and 25 nts located immediately downstream                                         | This study |
| pET21d                                   | <i>E. coli</i> protein expression vector harboring T7 promoter                                                                                                                                                          | Novagen    |
| pETCovR                                  | pET21d derived plasmid containing <i>covR</i> with TEV cleavage site followed by His <sub>6</sub> tag at its C-terminus                                                                                                 | This study |
| pETCovRD53E                              | pETCovR derived plasmid containing a D53E mutation in CovR                                                                                                                                                              | This study |
| pEU7534                                  | pET15b derived vector containing <i>rpoD</i>                                                                                                                                                                            | (12)       |

<sup>a</sup> - The whole genome of the mutant was sequenced (Virginia Bioinformatics Institute at Virginia Tech). We found that the strain has a deletion in the *spyB* gene in addition to a deletion of the terminator. The *spyB* deletion was rescued through insertion of the WT copy of *spyB* in the mutant chromosome. The “rescued” strain had the phenotype similar to the SF370 $\Delta$ 63T mutant indicating that the phenotype of the mutant is due to a deletion of the terminator.

**Table S2.** General primers

| Primer       | Sequence <sup>a</sup>                             |
|--------------|---------------------------------------------------|
| hasR-BamHI-f | GATC <u>GGATCC</u> GTTCTGGGCTACCATATTCTGAC        |
| hasR-XhoI-r  | CAGT <u>CTCGAG</u> CTGTTGCAGCATAAACTGTCTCATC      |
| P2-BglII-f   | CGTGAGATCTCTACAATATATCCTTTACCAG                   |
| P2-XhoI-r    | CAGT <u>CTCGAG</u> TATCTCAAATAAATTGAATTG          |
| term-XhoI-r  | ACGT <u>CTCGAG</u> CCCCCAAAAAAGAAAAATCAGG         |
| RPA-f        | GCGGTTATTTTGGAGATAATTTATATTA                      |
| RPA-r        | TTCCCCCAAAAAAGAAAAATCAGG                          |
| hasART-f     | CGCGGAGTAATATTAATAACCTATC                         |
| hasS-f       | CCGT <u>GAGTCT</u> CCTTTACCAGTTATCATATTTCTTG      |
| hasS-r       | CCGT <u>GAGTCT</u> GGCACAATTACACCTCTTTC           |
| hasART-r     | CAGCAGCAACTTTATAGTCATG                            |
| plr-f        | CGTCTTGCATTCCGCCGTATTC                            |
| plr-r        | GATCTGTAAGGTCATTGATACG                            |
| hasSRT-f     | CCGCGCCGCAATTCAATTATTTTGGAGATAAT                  |
| hasSRT-r     | GCGCGCGGAAAAGAAAAATCAGGATAATTTATT                 |
| 1            | GCGGCTTTTTTTGACTTAATTGTCGGG                       |
| 2            | CCATTTTTATTTCAGGTTAGGTG                           |
| covR-NcoI-f  | CGC <u>ACCATGG</u> CCACAAAGAAAATTTTAATTATTGAAGATG |
| covR-XbaI-r  | GCGCTCTAGATTATTTCTCACGAATAACGTATCCC               |
| RNA-has-r1   | GCGGTTCCCCCAAAAAAGAAAAATCAGG                      |
| mga-f        | TGCGTGATCGTGACTGTTTTTTG                           |
| mga-r        | GTTCTCTCCACTGTTGACTTGTAAC                         |
| F1           | CAAGGAAATTA AAAAAGAAAG                            |
| F2           | TTATTA AAAATATTTCTATGACTAGTTGAC                   |
| F3           | GATAAAACTATTTGAAAAGTTTGC                          |
| F4           | CTACAATATATCCTTTACCAGTTATCATATTTCTTG              |
| R            | CCATAAATTCCTACAGTTGATGTTCC                        |
| rtqRT-f      | GCGCGCGTTATTA AAAATATTTCTATGAC                    |
| rtqRT-r      | GACAGGGACCTCGATATTC                               |
| P1-f         | GCGCCAATTCAATTATTTTGGAG                           |
| P1-r         | CACGTCTCGAGCATAAATTCCTACAGTTGATGTTCC              |

<sup>a</sup> - Restriction sites are underlined.

**Table S3.** Primers for site-directed mutagenesis

| primer          | sequence                                               | Introduced mutations                                                                                                    |
|-----------------|--------------------------------------------------------|-------------------------------------------------------------------------------------------------------------------------|
| $\Delta$ hasS-f | CACAAAATTAGATAAAAAC TATTTGGGGGAAATTTTTTAATTTAAA<br>TAC | The P2 promoter and the entire <i>hasS</i> sequence are deleted                                                         |
| $\Delta$ hasS-r | GTATTTAAATTA AAAAATTTCCCCCAAATAGTTTTATCTAATTTT<br>GTG  |                                                                                                                         |
| $\Delta$ P2-f   | CACAAAATTAGATAAAAAC TATTTGTAACAATTCAATTATTTTGAG        | The P2 promoter is deleted                                                                                              |
| $\Delta$ P2-r   | CTCAAATAATTGAATTGTTACAAATAGTTTTATCTAATTTTGTG           |                                                                                                                         |
| mP1-f           | GACATTACCCCTTATTTATATTCTAGAATCGAGGTCCCTGTCTT<br>TCAAGG | The -10 box of the P1 promoter is mutated                                                                               |
| mP1-r           | CCTTGAAAGACAGGGACCTCGATTCTAGAATATAAATAAGGGG<br>TAATGTC |                                                                                                                         |
| $\Delta$ 42T-f  | CAATTCAATTATTTTGAGGGGGAAATTTTTTAATTTAAATAC             | a 42-nt deletion which includes the <i>hasS</i> terminator and the T-rich region                                        |
| $\Delta$ 42T-r  | GTATTTAAATTA AAAAATTTCCCCCTCAAATAATTGAATTG             |                                                                                                                         |
| $\Delta$ 63T-f  | CAATTCAATTATTTTGAGATAATTTTTATTA AAAAATATTTCTATGA<br>C  | a 63-nt deletion which includes the <i>hasS</i> terminator, the T-rich region and 25 nts located immediately downstream |
| $\Delta$ 63T-r  | GTCATAGAAATATTTTAAATA AAAAATTATCTCAAATAATTGAAT<br>TG   |                                                                                                                         |
| CovR-D53E-f     | GATTTAATCCTGCTTGAATTAATGTTACCAGAGATG                   | a D53E mutation in CovR                                                                                                 |
| CovR-D53E-r     | CATCTCTGGTAACATTAATTCAAGCAGGATTAATC                    |                                                                                                                         |

**Table S4.** Genetic diversity in the *hasS* region.

| GAS strain                                                | serotype          | <i>hasABC</i> locus | <i>hasS</i> terminator |                 |                 |              | P2 promoter mutation | IS 1239 | Repeats in <i>hasS</i> |
|-----------------------------------------------------------|-------------------|---------------------|------------------------|-----------------|-----------------|--------------|----------------------|---------|------------------------|
|                                                           |                   |                     | 42 bp stem-loop        | 34 bp stem-loop | 25 bp stem-loop | no stem-loop |                      |         |                        |
| <b>Strains analyzed in this study</b>                     |                   |                     |                        |                 |                 |              |                      |         |                        |
| MGAS2221 <sup>a</sup>                                     | M1                | + <sup>b</sup>      | - <sup>c</sup>         | -               | +               | -            | -                    | -       | -                      |
| SF370 <sup>a</sup>                                        | M1                | +                   | -                      | -               | +               | -            | -                    | -       | -                      |
| Bisno21                                                   | M3                | +                   | -                      | -               | -               | +            | +                    | -       | -                      |
| Manfredo <sup>a</sup>                                     | M5                | +                   | -                      | -               | -               | +            | +                    | +       | -                      |
| Vaughn                                                    | M5                | +                   | -                      | -               | -               | +            | +                    | +       | -                      |
| MGAS8232 <sup>a</sup>                                     | M18               | +                   | -                      | -               | -               | +            | -                    | -       | -                      |
| 87-282                                                    | M18               | +                   | -                      | -               | -               | +            | -                    | -       | -                      |
| NZ131 <sup>a</sup>                                        | M49               | +                   | -                      | +               | -               | -            | -                    | -       | -                      |
| Alab49 <sup>a</sup>                                       | M53               | +                   | +                      | -               | -               | -            | +                    | -       | -                      |
| Bisno9                                                    | M53               | +                   | +                      | -               | -               | -            | +                    | -       | -                      |
| <b>NCBI's complete genomes</b>                            |                   |                     |                        |                 |                 |              |                      |         |                        |
| M1 GAS                                                    | M1                | +                   | -                      | -               | +               | -            | -                    | -       | -                      |
| MGAS5005                                                  | M1                | +                   | -                      | -               | +               | -            | -                    | -       | -                      |
| M1 476                                                    | M1                | +                   | -                      | -               | +               | -            | -                    | -       | -                      |
| A20                                                       | M1                | +                   | -                      | -               | +               | -            | -                    | -       | -                      |
| MGAS10270                                                 | M2                | +                   | -                      | -               | -               | +            | -                    | -       | -                      |
| SSI-1                                                     | M3                | +                   | -                      | -               | -               | +            | +                    | -       | -                      |
| MGAS315                                                   | M3                | +                   | -                      | -               | -               | +            | +                    | -       | -                      |
| MGAS10750                                                 | M4                | -                   | -                      | -               | -               | -            | -                    | -       | -                      |
| MGAS10394                                                 | M6                | +                   | +                      | -               | -               | -            | +                    | +       | +                      |
| MGAS9429                                                  | M12               | +                   | -                      | +               | -               | -            | -                    | -       | -                      |
| MGAS2096                                                  | M12               | +                   | -                      | +               | -               | -            | -                    | -       | -                      |
| HKU                                                       | M12               | +                   | -                      | +               | -               | -            | -                    | -       | -                      |
| QMN11M0907901                                             |                   |                     |                        |                 |                 |              |                      |         |                        |
| HSC5                                                      | M14               | +                   | -                      | -               | -               | +            | +                    | -       | -                      |
| MGAS6180                                                  | M28               | +                   | -                      | +               | -               | -            | -                    | -       | -                      |
| MGAS1881                                                  | M59               | +                   | -                      | +               | -               | -            | -                    | -       | -                      |
| MGAS15252                                                 | M59               | +                   | -                      | +               | -               | -            | -                    | -       | -                      |
| <b>NCBI's whole genome shotgun sequencing<sup>a</sup></b> |                   |                     |                        |                 |                 |              |                      |         |                        |
| GA41345                                                   | M1                | +                   | -                      | -               | +               | -            | -                    | -       | -                      |
| DSM 20565                                                 | M1                | +                   | -                      | -               | +               | -            | -                    | -       | -                      |
| GA40634                                                   | M4                | -                   | -                      | -               | -               | -            | -                    | -       | -                      |
| GA19700                                                   | M6                | +                   | +                      | -               | -               | -            | +                    | +       | +                      |
| GA19681                                                   | M6                | +                   | +                      | -               | -               | -            | +                    | +       | +                      |
| BJCYGAS15                                                 | M12               | +                   | -                      | -               | -               | +            | -                    | -       | -                      |
| HLJGAS12011                                               | M12               | +                   | -                      | -               | -               | +            | -                    | -       | -                      |
| SP1-LAU                                                   | M12               | +                   | -                      | +               | -               | -            | -                    | -       | -                      |
| GA41394                                                   | M18               | +                   | -                      | -               | -               | +            | -                    | -       | -                      |
| ATCC 10782                                                | M24               | +                   | -                      | +               | -               | -            | -                    | -       | -                      |
| GA40377                                                   | M28               | +                   | -                      | +               | -               | -            | -                    | -       | -                      |
| 06BA18369                                                 | M41.2             | +                   | -                      | +               | -               | -            | +                    | -       | -                      |
| M49 591                                                   | M49               | +                   | -                      | +               | -               | -            | -                    | -       | -                      |
| GA40884                                                   | M59               | +                   | -                      | +               | -               | -            | -                    | -       | -                      |
| GA03747                                                   | M66               | +                   | -                      | +               | -               | -            | -                    | -       | -                      |
| GA03455                                                   | n.a. <sup>e</sup> | +                   | +                      | -               | -               | -            | +                    | -       | -                      |
| GA03805                                                   | n.a.              | +                   | +                      | -               | -               | -            | +                    | -       | -                      |
| GA41039                                                   | n.a.              | +                   | +                      | -               | -               | -            | +                    | -       | -                      |
| UTMEM-1                                                   | n.a.              | +                   | -                      | +               | -               | -            | -                    | -       | -                      |
| UTSW-2                                                    | n.a.              | +                   | -                      | +               | -               | -            | -                    | -       | -                      |
| GA16797                                                   | n.a.              | +                   | -                      | +               | -               | -            | -                    | -       | -                      |
| GA03799                                                   | n.a.              | +                   | -                      | +               | -               | -            | -                    | -       | -                      |

|         |      |   |   |   |   |   |   |   |   |
|---------|------|---|---|---|---|---|---|---|---|
| GA40056 | n.a. | + | - | + | - | - | - | - | - |
| GA19702 | n.a. | + | - | + | - | - | - | - | - |
| GA41046 | n.a. | + | - | - | - | + | - | - | - |

<sup>a</sup> – complete genomes; <sup>b</sup> – present; <sup>c</sup> – absent; <sup>d</sup> - GAS genomes with the partial sequence of the *hasS* locus were not selected for analysis; <sup>e</sup> - serotype information is not available.

Figure S1

**A**

TTTTTTTGACTTAATTGTCGGGATTCTAGTGTTAGTAAAATATAGTTTTCTACAATATATCCTTTACCAGTTATCATATTTCTTGATATTTTTTAAAAATCAAATATATCTAT

P2 promoter -10

TTTTTTCACAAAATTAGATAAAACTATTTGAAAAGTTTGCTAAAATAATTTATAACAATCAATTATTTTGAGATAATTTATATTTAAATAAAATTATCCTGATTTTTCTTTTTT

-35 P1 promoter -10

GGGGGAAATTTTTTAATTTAAATACATTTTTATTTAAAAATATTTCTATGACTAGTTGACATTACCCCTTATTTATATTAGAAATATCGAGGTCCTGTCTTTCAAGGAAATTA

AAAAAGAAAGAGGTGTAATTGTGCCTATTTTTAAAAAACTTAATTGTTTTATCCTTTATTTTTTGGATATCTATCTTGATTATCTAAATATGTATCTATTTGGAACATCA

ACTGTAGGAATTTATG

**B**

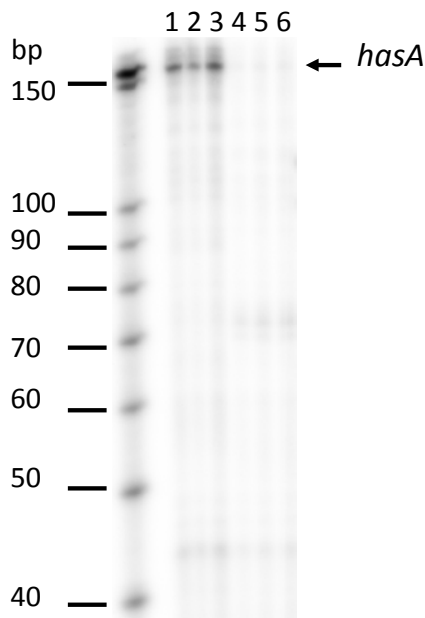

**Fig. S1.** The *hasA* upstream region encodes the P1 promoter. **A.** Nucleotide sequence of the *hasA* upstream region in GAS M1-serotype.  $-35$ ,  $-10$  and extended  $-10$  promoter regions are underlined. Bent arrows denote the transcriptional start sites of *hasS* identified by 5' RACE analysis and *hasA* according to the published results of primer extension analysis (13). Horizontal arrows indicate the location of the primers, P1-f and P1-r (Table S2), used for *in vitro* transcription of the P1 promoter region. The transcriptional product is shown in blue font. **B.** Time-course of *in vitro* RNA synthesis from a PCR product carrying the P1 promoter. Shown is a 10% denaturing urea polyacrylamide gel containing *in vitro* transcribed RNA products using GAS RNA polymerase and  $\sigma^A$ . DNA template for transcriptional reactions loaded in the lanes 1, 2 and 3 was PCR amplified from MGAS2221 genomic DNA using the primers pair of P1-f and P1-r. DNA template for transcriptional reactions loaded in the lanes 4, 5 and 6 was PCR amplified from 2221P1<sup>-</sup> strain genomic DNA using the same primer pair. Lane 1 and 4, 30 min; lane 2 and 5, 60 min; lane 3 and 6, 90 min. The RNA ladder is labeled in bases.

Figure S2

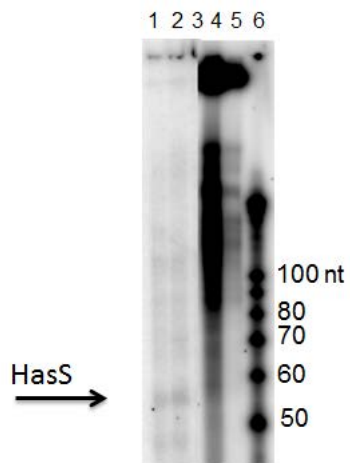

**Fig. S2.** RPA identifying transcript in the intergenic region upstream of *hasA* and downstream of M5005\_Spy\_1850. Lane 1, RPA with RNA isolated from 2221 $\Delta$ *covR*; Lane 2, RPA with RNA isolated from 2221/ $\rho$ KSM*hasS*; Lane 3, RPA with RNA isolated from MGAS2221; Lane 4, no-RNase control; Lane 5, the probe, Lane 6, RNA ladder



Figure S3

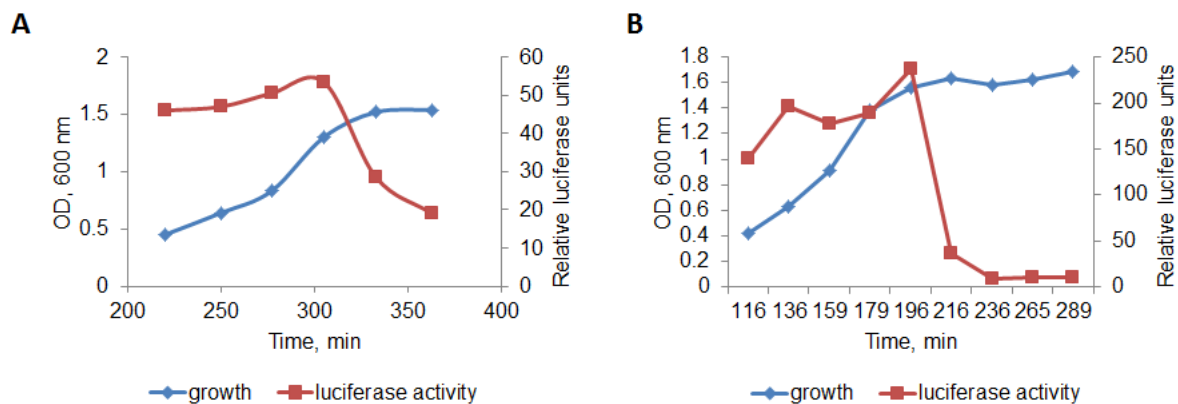

**Fig. S3.** Transcriptional analysis of the P2 promoter. Time courses of luciferase activity was carried out on *S. pyogenes* strains harboring the P2::*luc* fusion. Panel **A** shows the results obtained with the WT strain and panel **B** shows the results obtained with the 2221Δ*covR* mutant. The results of one representative experiment out of three independent experiments are shown.

Figure S4

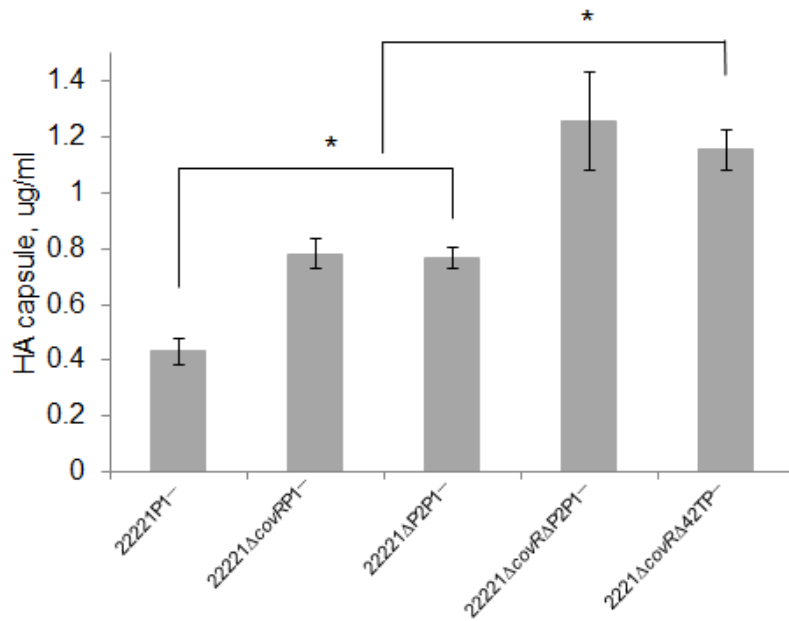

**Fig. S4.** The RNA product from *hasS* region negatively regulates capsule expression. The strains harvested at the mid-exponential growth phase. The experiments were performed in triplicate, and mean values  $\pm$  standard deviations are shown. \* denotes statistically significant differences calculated using the Student's test.

Figure S5

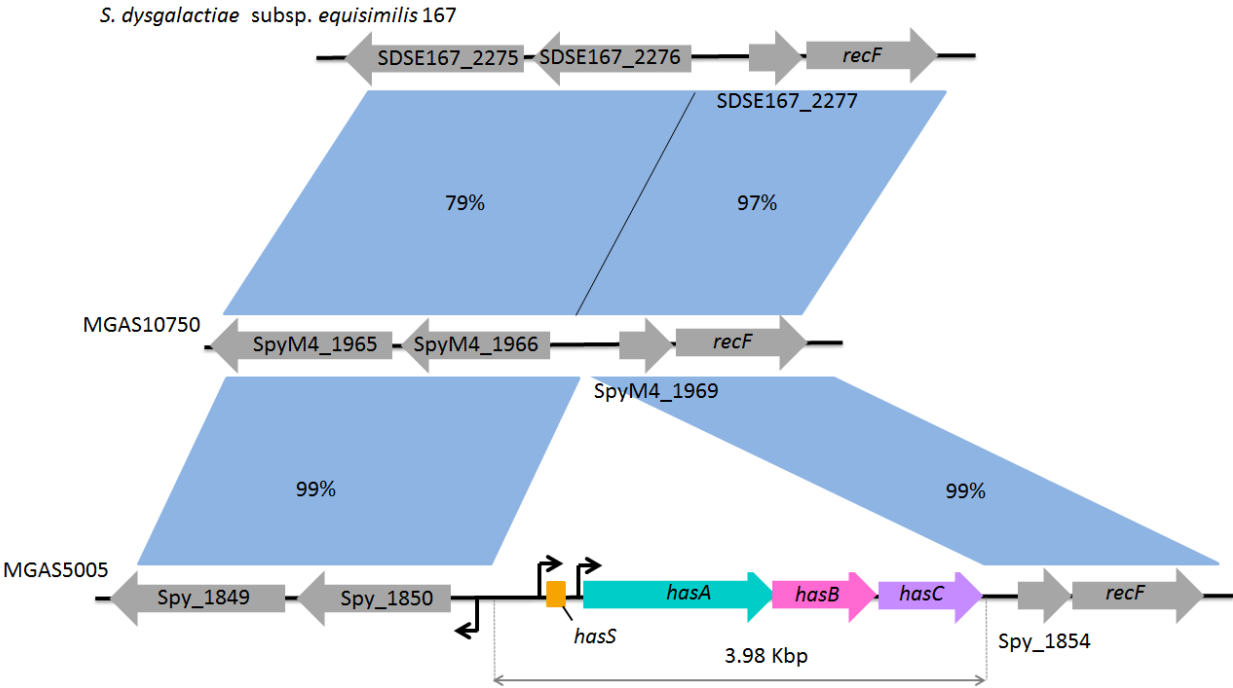

**Fig. S5.** Comparative genome alignment of the *hasABC* operon and the flanking DNA regions from *S. dysgalactiae* subsp. *equisimilis* 167 and *S. pyogenes* strains — MGAS5005 (M1-serotype) and MGAS10750 (M4-serotype). Bent arrows indicate the promoters in the *hasA* upstream region. Blue bars separating each genome represent similarity matches.

Figure S6.

```
M1 AACAAATCAATTATTTTGAGATAATTTAT-----ATTAAATAAAATATCCTGATTTTCTTTT
M53 AACAAATCAATTATTTTGGGATAATTTAT-----TTAATATATATTAATAAAATATCCTGATTTTCTTTT
M6 AACAAATCAATTATTTTGGGATAATTTATAACAATTC AATTATTTTGGGATAATTTATAACAATTC AATTATTTTGGGATAATTTATTTAATATATATTAATAAAATATCCTGATTTTCTTTT
```

**Fig. S6.** Sequence alignment of *hasS* from serotypes M1, M53 and M6. The terminator hairpin is marked by inverted arrows. Brackets denote DNA repeats in *hasS* from serotype M6.

## References

1. **Sumby P, Porcella SF, Madrigal AG, Barbian KD, Virtaneva K, Ricklefs SM, Sturdevant DE, Graham MR, Vuopio-Varkila J, Hoe NP, Musser JM.** 2005. Evolutionary origin and emergence of a highly successful clone of serotype M1 group A Streptococcus involved multiple horizontal gene transfer events. *J Infect Dis* **192**:771-782.
2. **Ferretti JJ, McShan WM, Ajdic D, Savic DJ, Savic G, Lyon K, Primeaux C, Sezate S, Suvorov AN, Kenton S, Lai HS, Lin SP, Qian Y, Jia HG, Najjar FZ, Ren Q, Zhu H, Song L, White J, Yuan X, Clifton SW, Roe BA, McLaughlin R.** 2001. Complete genome sequence of an M1 strain of Streptococcus pyogenes. *Proceedings of the National Academy of Sciences of the United States of America* **98**:4658-4663.
3. **Opdyke JA, Scott JR, Moran CP, Jr.** 2001. A secondary RNA polymerase sigma factor from Streptococcus pyogenes. *Molecular microbiology* **42**:495-502.
4. **Smoot JC, Barbian KD, Van Gompel JJ, Smoot LM, Chaussee MS, Sylva GL, Sturdevant DE, Ricklefs SM, Porcella SF, Parkins LD, Beres SB, Campbell DS, Smith TM, Zhang Q, Kapur V, Daly JA, Veasy LG, Musser JM.** 2002. Genome sequence and comparative microarray analysis of serotype M18 group A Streptococcus strains associated with acute rheumatic fever outbreaks. *Proceedings of the National Academy of Sciences of the United States of America* **99**:4668-4673.
5. **Ashbaugh CD, Alberti S, Wessels MR.** 1998. Molecular analysis of the capsule gene region of group A Streptococcus: the hasAB genes are sufficient for capsule expression. *Journal of bacteriology* **180**:4955-4959.
6. **Holden MT, Scott A, Cherevach I, Chillingworth T, Churcher C, Cronin A, Dowd L, Feltwell T, Hamlin N, Holroyd S, Jagels K, Moule S, Mungall K, Quail MA, Price C, Rabinowitsch E, Sharp S, Skelton J, Whitehead S, Barrell BG, Kehoe M, Parkhill J.** 2007. Complete genome of acute rheumatic fever-associated serotype M5 Streptococcus pyogenes strain manfredo. *Journal of bacteriology* **189**:1473-1477.
7. **Lizano S, Luo F, Tengra FK, Bessen DE.** 2008. Impact of orthologous gene replacement on the circuitry governing pilus gene transcription in streptococci. *PLoS One* **3**:e3450.
8. **McShan WM, Ferretti JJ, Karasawa T, Suvorov AN, Lin S, Qin B, Jia H, Kenton S, Najjar F, Wu H, Scott J, Roe BA, Savic DJ.** 2008. Genome sequence of a nephritogenic and highly transformable M49 strain of Streptococcus pyogenes. *Journal of bacteriology* **190**:7773-7785.
9. **Trevino J, Perez N, Ramirez-Pena E, Liu Z, Shelburne SA, 3rd, Musser JM, Sumby P.** 2009. CovS simultaneously activates and inhibits the CovR-mediated repression of distinct subsets of group A Streptococcus virulence factor-encoding genes. *Infection and immunity* **77**:3141-3149.
10. **Kinkel TL, McIver KS.** 2008. CcpA-mediated repression of streptolysin S expression and virulence in the group A streptococcus. *Infection and immunity* **76**:3451-3463.
11. **Zhu H, Liu M, Sumby P, Lei B.** 2009. The secreted esterase of group A streptococcus is important for invasive skin infection and dissemination in mice. *Infection and immunity* **77**:5225-5232.
12. **Gusa AA, Scott JR.** 2005. The CovR response regulator of group A streptococcus (GAS) acts directly to repress its own promoter. *Molecular microbiology* **56**:1195-1207.
13. **Crater DL, van de Rijn I.** 1995. Hyaluronic acid synthesis operon (has) expression in group A streptococci. *The Journal of biological chemistry* **270**:18452-18458.
